# Supplementary material for: Direct ink writing of tough, stretchable silicone composites
Source: Royal Society of Chemistry journal article supplement (doi:10.1039/d2sm00923d), 2022-01-01
Supplement: d2sm00923d1.pdf [file d2sm00923d1.pdf]

<sup>1</sup> **Supporting information for *Direct ink writing of tough,***  
<sup>2</sup> ***stretchable silicone composites***

<sup>3</sup> Chengyang Mo<sup>1</sup>, Rui Yin<sup>1</sup>, Jordan R. Raney<sup>1</sup>

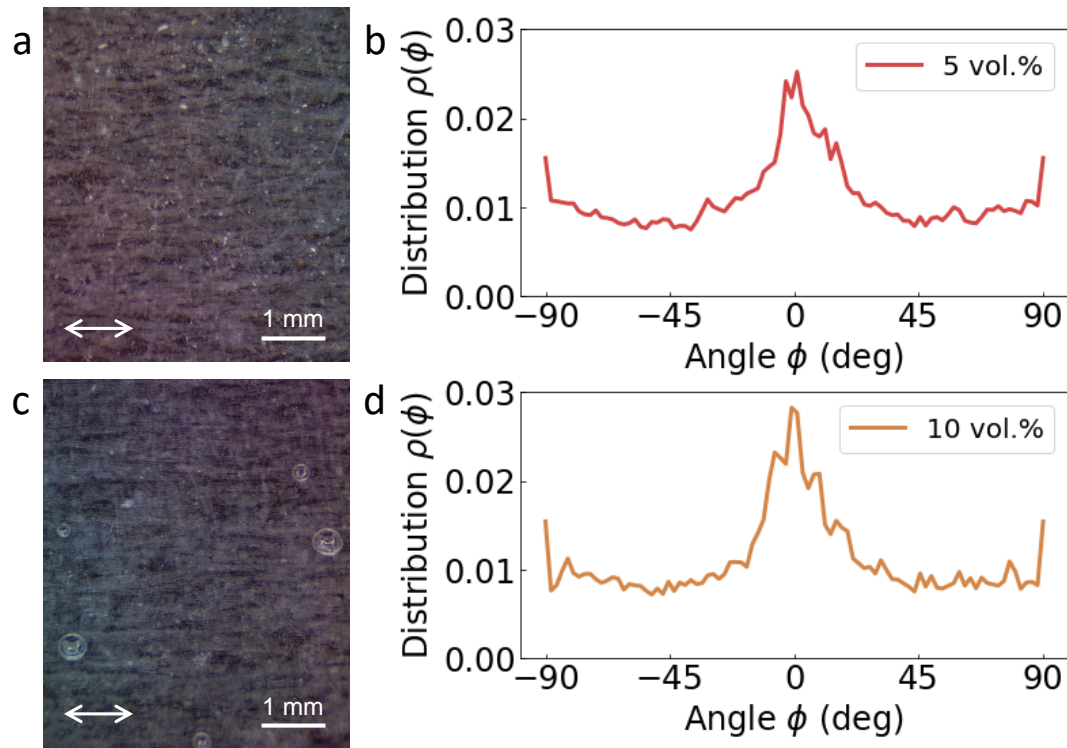

**Figure S1:** (a) Optical microscope image of surface of 5 vol.% PDUO-GF composites. (b) Distribution of fiber orientations for 5 vol.% composites. (c) Optical microscope image of surface of 10 vol.% PDUO-GF composites. (d) Distribution of fiber orientations for 10 vol.% composites. The fibers in the images are seen to be aligned in the direction of printing, as indicated by the white arrows.

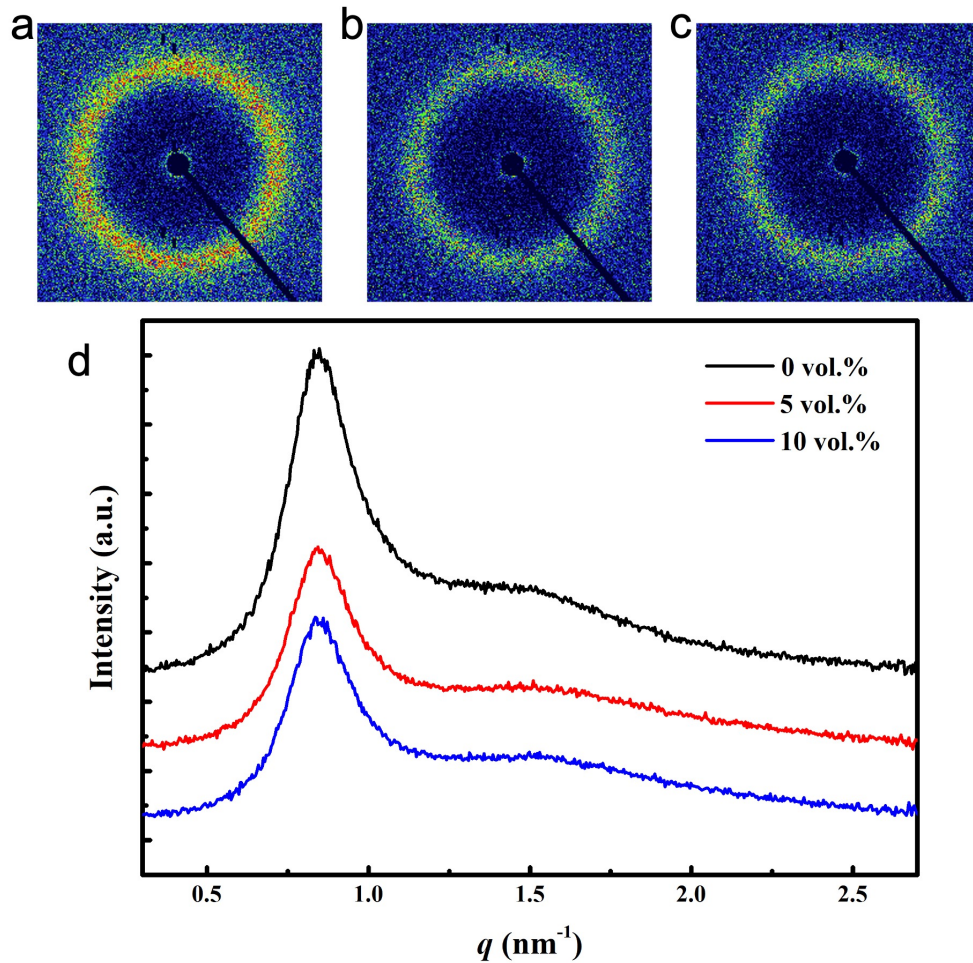

**Figure S2:** Small angle X-ray scattering (SAXS) patterns for 3D-printed PDUO with (a) 0 vol.%, (b) 5 vol.%, and (c) 10 vol.% glass fibers. (d) SAXS spectrum for 3D-printed PDUO. The SAXS results indicate the existence of hydrogen bonding interdomain with a distance of 7.4 nm. The presence of GFs does not significantly alter the spectrum. SAXS was performed using a Xeuss 2.0 Dual Source Environmental X-ray Scattering System with Cu source, 0.154 nm wavelength, at 50 kV and 0.6 mA current. The sample was in a vacuum chamber at room temperature. The sample-detector distance was set to 177 mm, giving a measurement  $2\theta$  value range of  $0.92^\circ$  to  $37^\circ$ . The X-ray exposure time was 600 s.

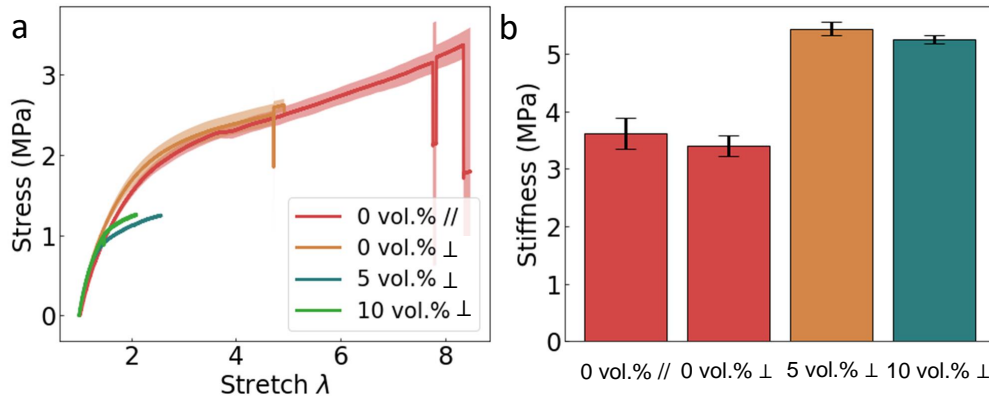

**Figure S3:** (a) Stress-stretch response of PDUO (with no fibers) when loaded parallel with or perpendicular to the print direction, and response of PDUO-GF composites when loaded perpendicular to the fiber (and print) direction. (b) Stiffness of 3D-printed PDUO and PDUO-GF composites when loaded perpendicular to the print path.

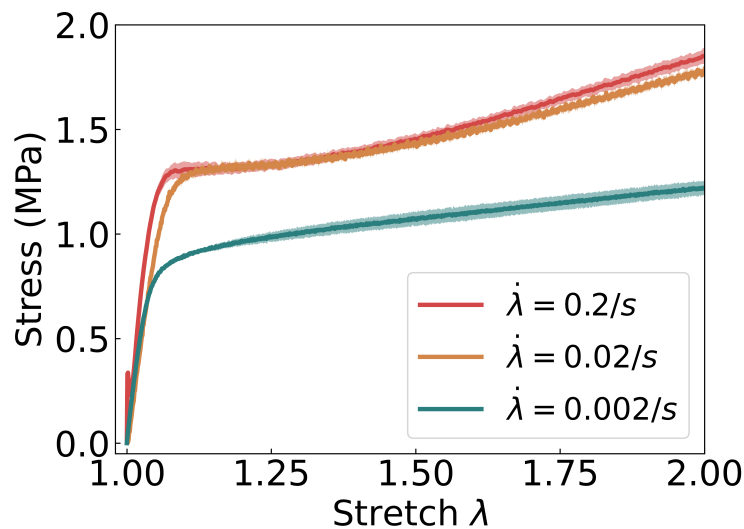

**Figure S4:** Stress-stretch responses of PDUO-GF composites at 5 vol.% when loaded at different loading rates. When the composite is loaded at a much slower speed, the overall stress is much lower at stretches beyond initial yielding.

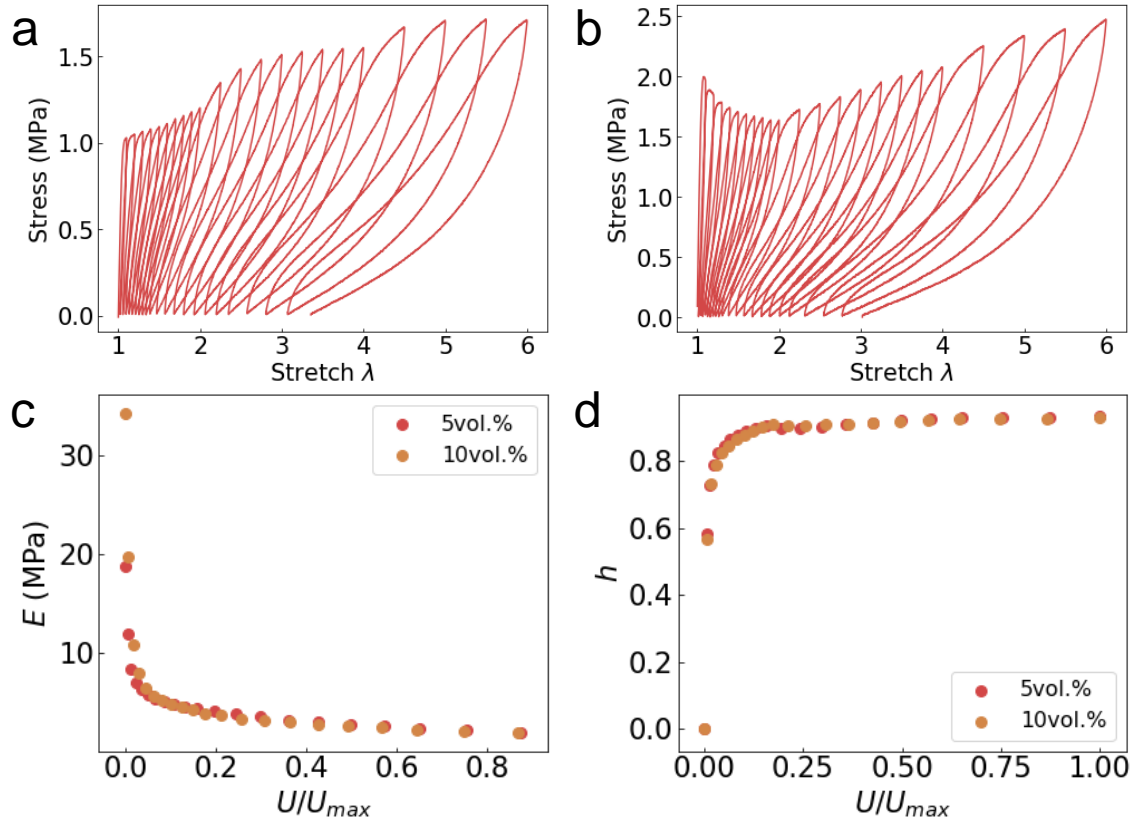

**Figure S5:** Cyclic loading of PDUO-GF composites: (a) and (b) Stress-stretch response of 5 vol.% and 10 vol.% composites, respectively, under cyclic loading of increasing stretch amplitude. (c) Initial stiffness during each reloading step as a function of strain energy density, normalized by the maximum strain energy density at fracture. (d) Hysteresis ratio as a function of normalized strain energy density, representing the degree of damage and fraction of energy dissipated during the loading and unloading process. The hysteresis ratio  $h$  indicates the fraction of strain energy that is dissipated during loading and unloading. It is defined as  $h = W_D/W$ , where  $W_D$  is the work dissipated during the loading-unloading cycle and  $W$  is the strain energy density of the pristine material at a given stretch  $\lambda$ .

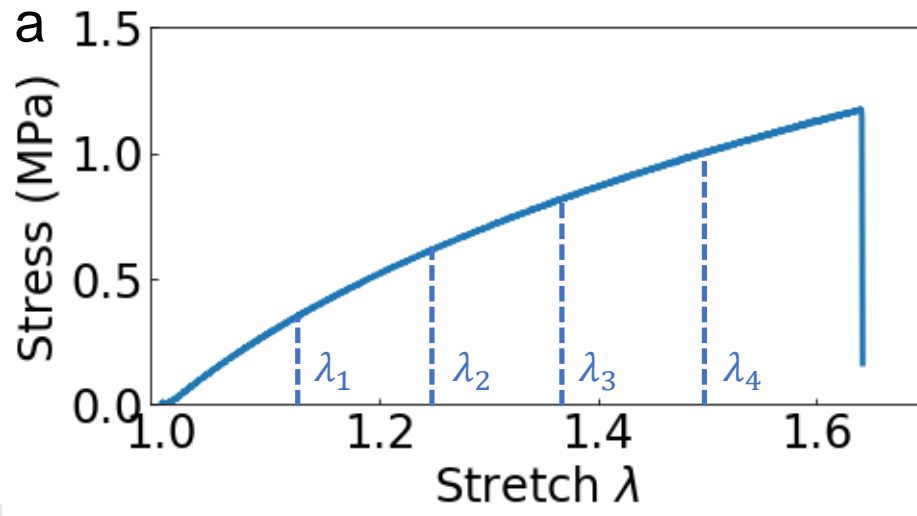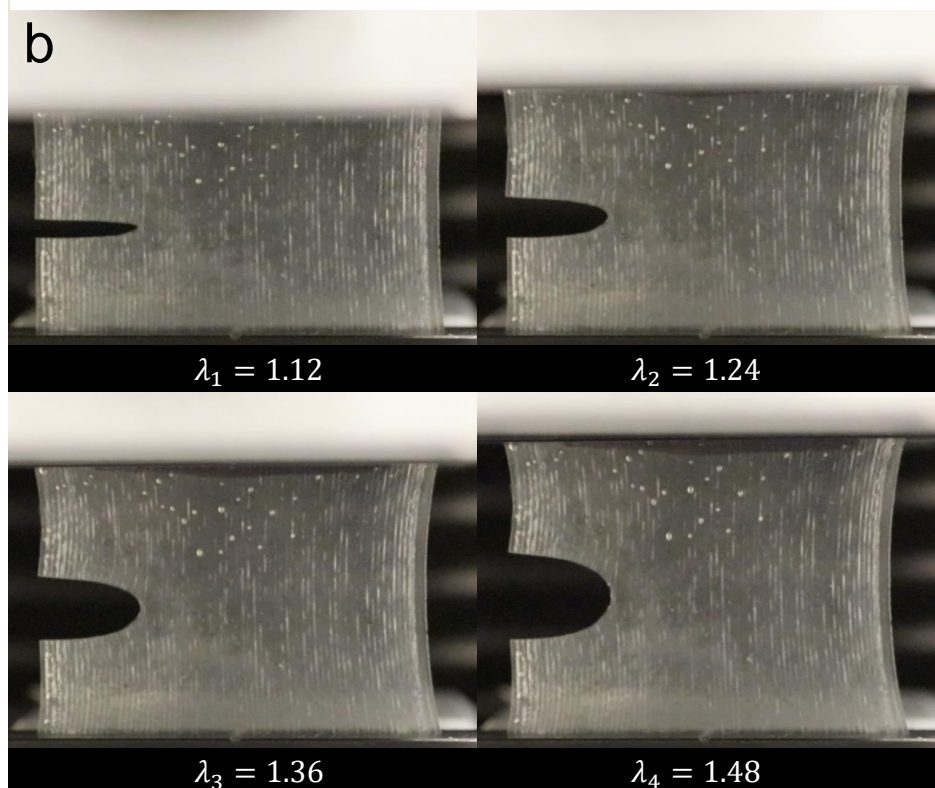

**Figure S6:** (a) Representative stress-stretch behavior of notched 3D printed PDUO without fibers.

(b) Optical images of the deformation of the sample at indicated stretch levels.
